# Supplementary material for: Genetic diversity, connectivity and gene flow along the distribution of the emblematic Atlanto-Mediterranean sponge Petrosia ficiformis (Haplosclerida, Demospongiae)
Source: PubMed Central journal article supplement (PMC6335727; doi:10.1186/s12862-018-1343-6), 2019-01-16

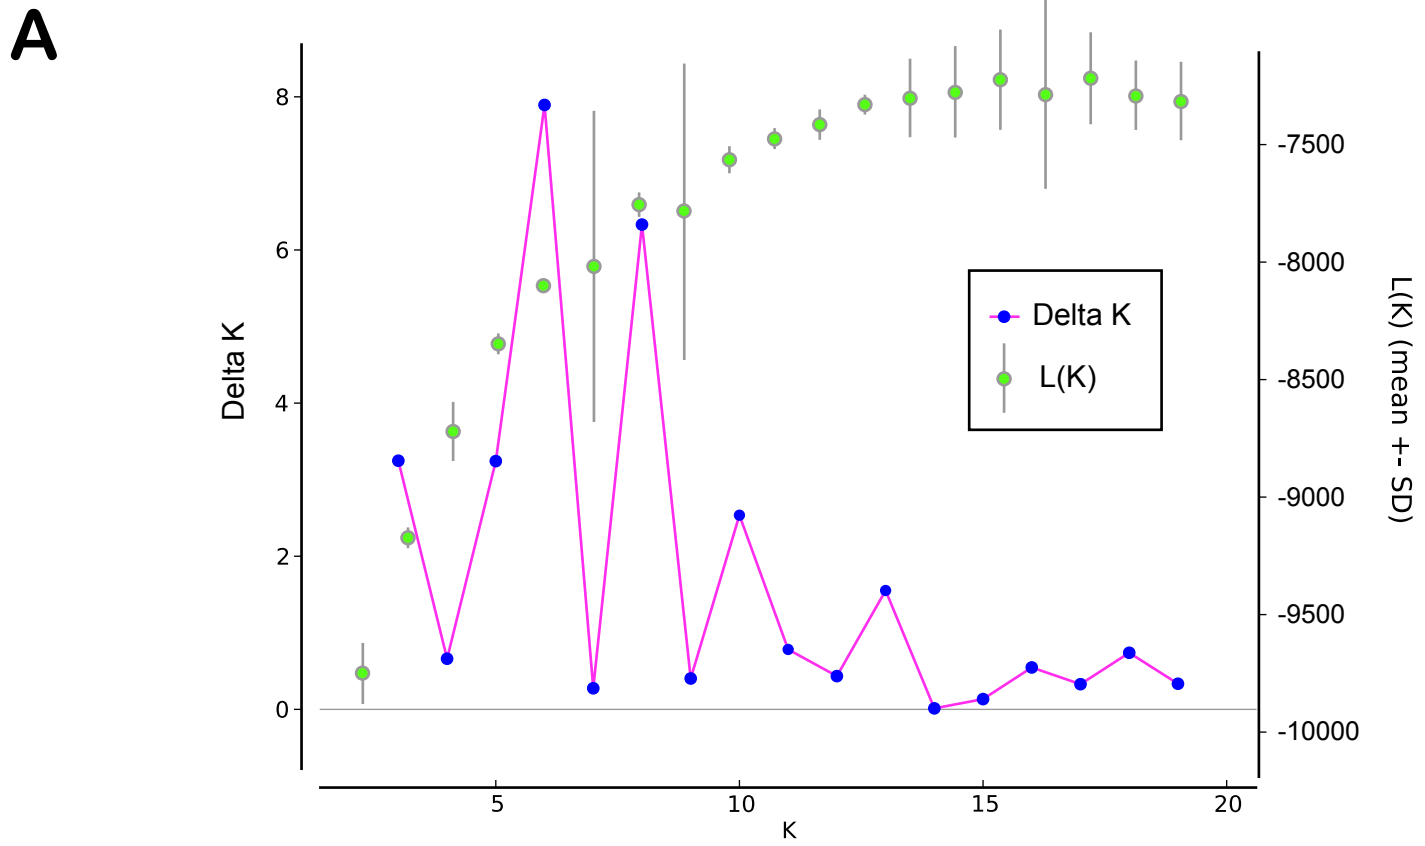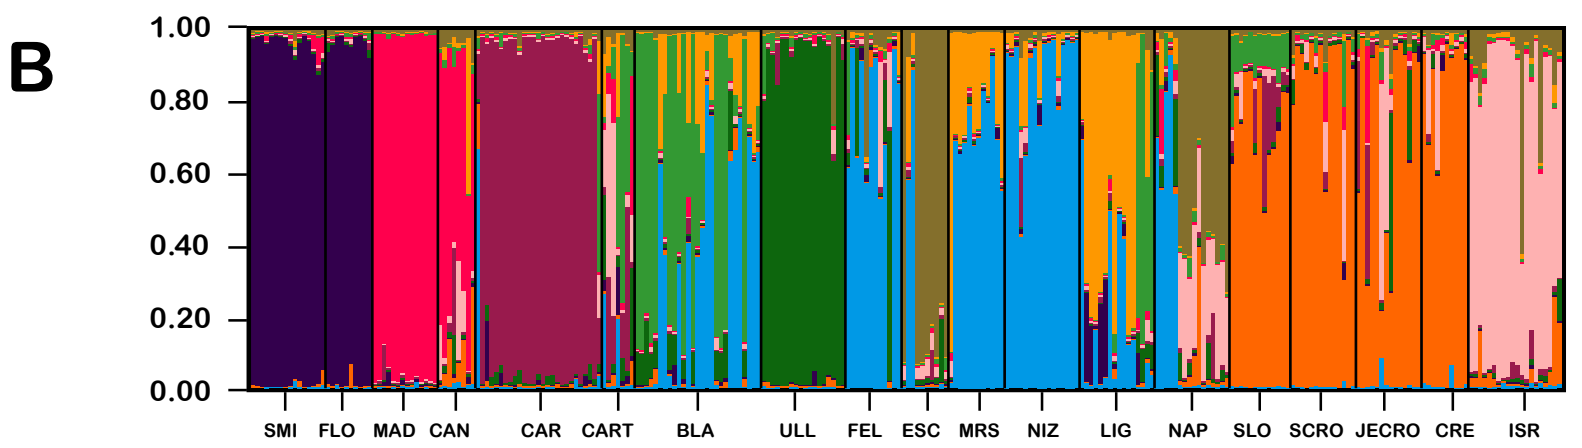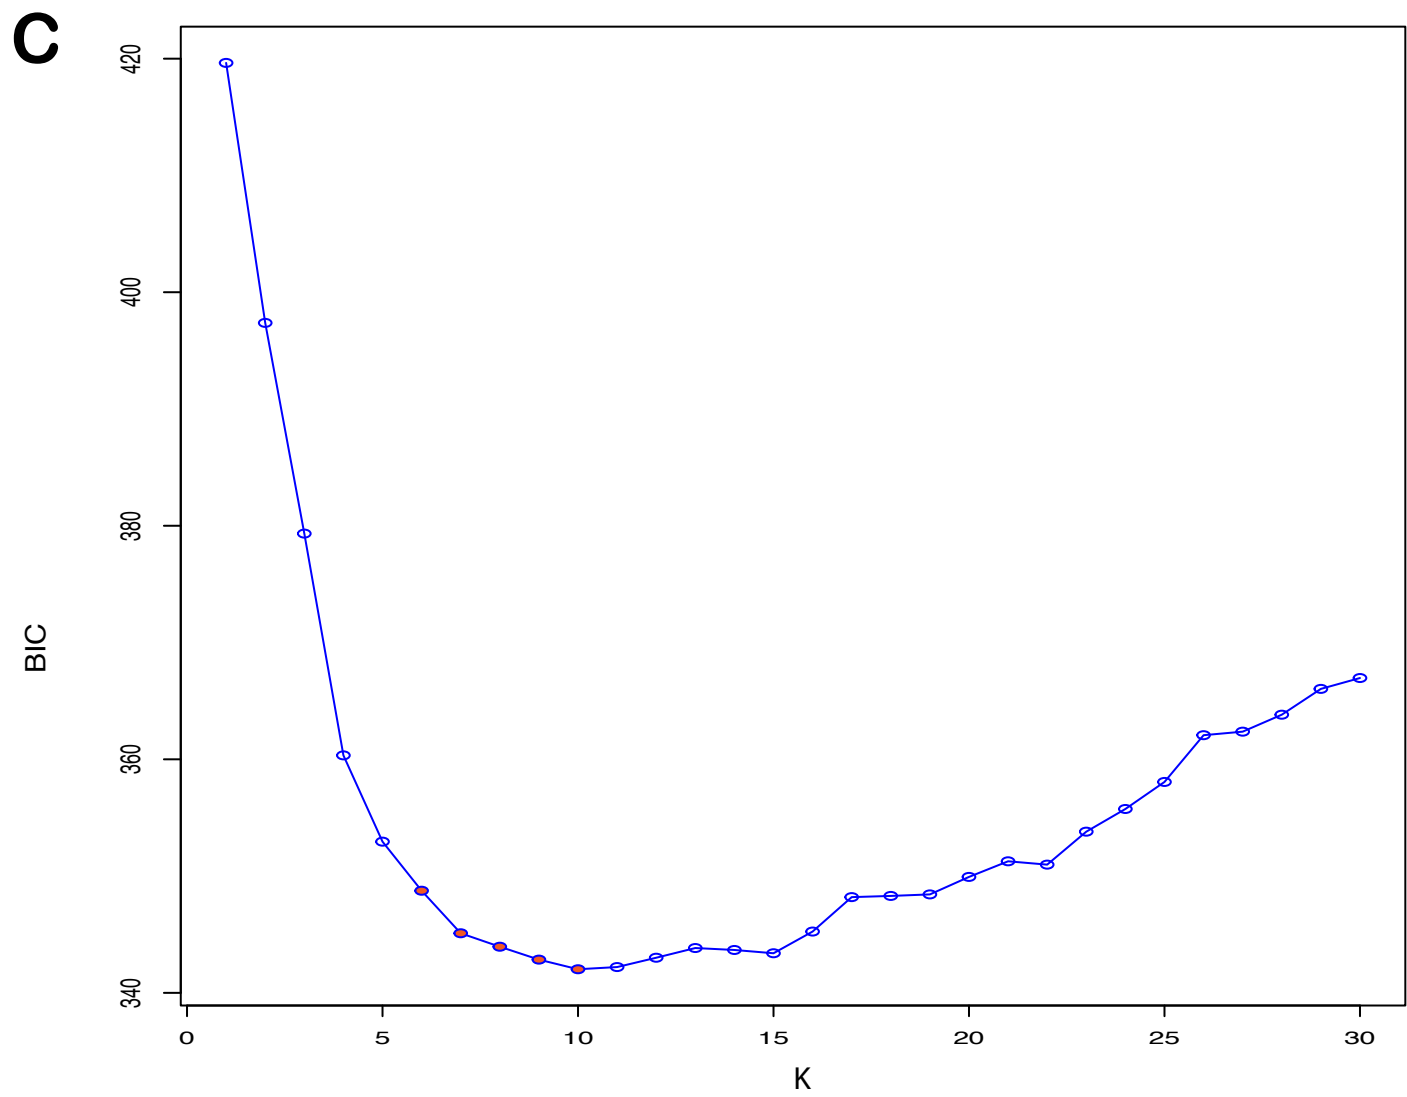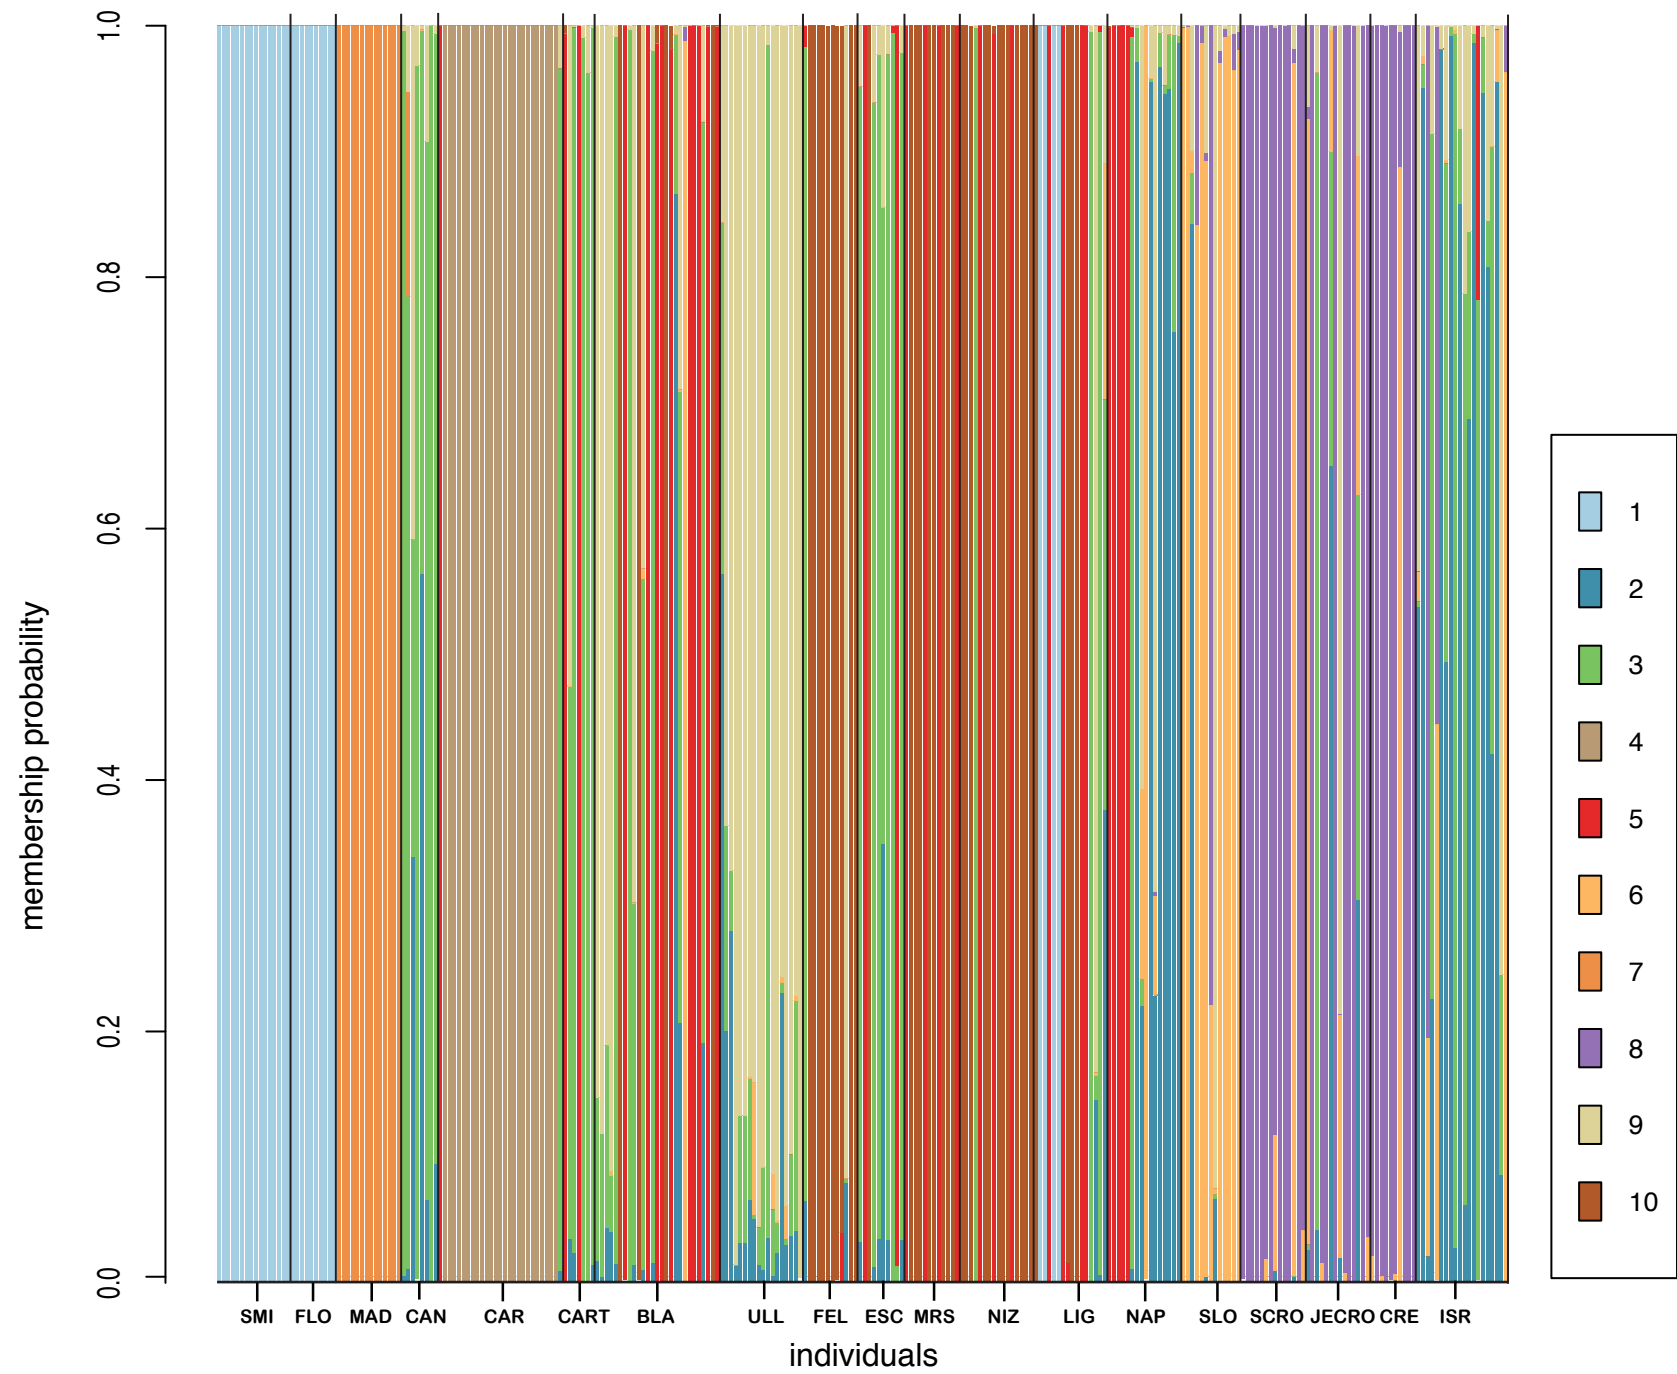

Supplement: 12862_2018_1343_MOESM3_ESM.pdf [file 12862_2018_1343_MOESM3_ESM.pdf]
